# Supplementary material
Source: PubMed Central journal article supplement (PMC3149863)
Supplement: NIHMS312142-supplement-01.pdf [file NIHMS312142-supplement-01.pdf]

## **Online Supplement - Dyspnea-12 in asthma**

### **Methods for confirmatory factor analysis**

*Confirmatory factor analysis (CFA)*. CFA is used to examine the relationship hypothesized to exist between observed variables and their underlying latent constructs (i.e. factor structure). In this study, the latent constructs would be the physical and affective perceptions of dyspnea.<sup>1</sup> This is in contrast to exploratory factor analysis (EFA) which involves an “orderly simplification of interrelated measures” in which there is no preconceived or hypothesized structure of how the variables relate.<sup>1</sup> CFA requires an *a priori* specification of the model, and the analysis tests how well the data fit this model. It is recommended that 5-20 cases per variable (i.e., questionnaire item) be used to perform a CFA.

CFA involves a battery of tests to determine the adequacy of model fit to the data. Results may be discordant, but fit is considered acceptable if the majority of tests support adequate fit to the model. The statistics that are often used to determine model fit with CFA include the following: 1) chi-square—assesses the difference between observed and expected covariance matrices, and values close to zero indicate acceptable fit; 2) the Comparative Fit Index (CFI) is the same as the discrepancy function adjusted for sample size, and larger values (closer to one and  $\geq 0.90$ ) indicate acceptable fit; 3) Root Mean Square Error of Approximation (RMSEA) relates to the residual of the model, and smaller values (close to zero and  $< 0.06$ ) indicate acceptable fit; 4) Bentler and Bonnett’s Normed Fit Index (NFI)<sup>2</sup> tests the null hypothesis that the model is one in which all of the correlations or covariances are zero, and values  $\geq 0.90$  indicate acceptable fit; and 5) Bentler and Bonnett’s Non-normed index (NNI) touted to better reflect fit at all sample sizes, with values  $\geq 0.90$  indicating acceptable fit.<sup>2</sup> We used PROC CALIS in SAS version 9.1.3 (SAS Inc., Cary, NC) to test the hypothesized two-factor structure (items 1-7 would load on a factor describing the latent variable “physical perceptions of dyspnea,”; items 8-12 would load on a factor describing the latent variable “affective perceptions of dyspnea”).

## Results

i) *Manifest Variable Equations with Estimates.* Parameter estimates for the confirmatory factor model are significant at the 0.01 level if the t value exceeds 2.56.

|                     |                 |
|---------------------|-----------------|
| Item1 = 0.7907 *F1  | + 1.0000 e1     |
| Std Err 0.0828 p1,  | t Value 9.5498  |
| Item2 = 0.7740 *F1  | + 1.0000 e2     |
| Std Err 0.0762 p2,  | t Value 10.1513 |
| Item3 = 0.8012 *F1  | + 1.0000 e3     |
| Std Err 0.0750 p3,  | t Value 10.6862 |
| Item4 = 0.9333 *F1  | + 1.0000 e4     |
| Std Err 0.0835 p4,  | t Value 11.1745 |
| Item5 = 0.8439 *F1  | + 1.0000 e5     |
| Std Err 0.0799 p5,  | t Value 10.5562 |
| Item6 = 0.8439 *F1  | + 1.0000 e6     |
| Std Err 0.0819 p6,  | t Value 10.6422 |
| Item7 = 0.9442 *F1  | + 1.0000 e7     |
| Std Err 0.0898 p7,  | t Value 10.5140 |
| Item8 = 1.0473 *F2  | + 1.0000 e8     |
| Std Err 0.0873 p8,  | t Value 11.9996 |
| Item9 = 1.0665 *F2  | + 1.0000 e9     |
| Std Err 0.0877 p9,  | t Value 12.1426 |
| Item10 = 1.0406 *F2 | + 1.0000 e10    |
| Std Err 0.0852 p10, | t Value 12.2118 |
| Item11 = 1.0003 *F2 | + 1.0000 e11    |
| Std Err 0.0815 p11, | t Value 12.2796 |
| Item12 = 0.9061 *F2 | + 1.0000 e12    |
| Std Err 0.0810 p12, | t Value 11.1919 |

**ii) Variances of Exogenous Variables**

| Variable | Parameter | Standard Estimate | Error   | t Value |
|----------|-----------|-------------------|---------|---------|
| F1       |           | 1.00000           |         |         |
| F2       |           | 1.00000           |         |         |
| F3       |           | 1.00000           |         |         |
| e1       | vare1     | 0.35979           | 0.05531 | 6.505   |
| e2       | vare2     | 0.27185           | 0.04286 | 6.342   |
| e3       | vare3     | 0.23260           | 0.03784 | 6.148   |
| e4       | vare4     | 0.25265           | 0.04278 | 5.906   |
| e5       | vare5     | 0.27296           | 0.04402 | 6.200   |
| e6       | vare6     | 0.28040           | 0.04548 | 6.166   |
| e7       | vare7     | 0.34794           | 0.05597 | 6.217   |
| e8       | vare8     | 0.21079           | 0.03635 | 5.798   |
| e9       | vare9     | 0.20007           | 0.03523 | 5.678   |
| e10      | vare10    | 0.18267           | 0.03254 | 5.614   |
| e11      | vare11    | 0.16154           | 0.02913 | 5.546   |
| e12      | vare12    | 0.24125           | 0.03856 | 6.257   |

Variances are all significant at the 0.01 level.

**iii) Covariances Among Exogenous Variables**

| Var1 | Var2 | Parameter | Standard Estimate | Error   | t Value |
|------|------|-----------|-------------------|---------|---------|
| F1   | F2   | covf1f2   | 0.86736           | 0.02962 | 29.28   |

Covariance between latent constructs is significant at the 0.01 level.

**iv. Correlations Among Exogenous Variables**

| Var1 | Var2 | Parameter | Estimate |
|------|------|-----------|----------|
| F1   | F2   | covf1f2   | 0.86759  |

**v. Fit Statistics**

Chi-Square = 84.8381

Chi-Square DF = 53

Pr > Chi-Square = 0.0036

RMSEA Estimate = 0.0771

Bentler Comparative Fit Index (CFI) = 0.9759

Bentler-Bonett NFI = 0.9387

Bentler-Bonett Non-normed Index (NNI) = 0.9699

**References**

1. Suhr D. Exploratory or Confirmatory Factor Analysis? *SAS Users Group International Conference* Vol 31. San Francisco: SAS User's Group; 2006:Paper #200
2. Bentler PM. Comparative fit indexes in structural models. *Psychol Bull.* Mar 1990;107(2):238-246.
